# Supplementary material for: Effect of Breastfeeding Promotion on Early Childhood Caries and Breastfeeding Duration among 5 Year Old Children in Eastern Uganda: A Cluster Randomized Trial
Source: PubMed Central journal article supplement (PMC4418833; doi:10.1371/journal.pone.0125352), 2015-05-04

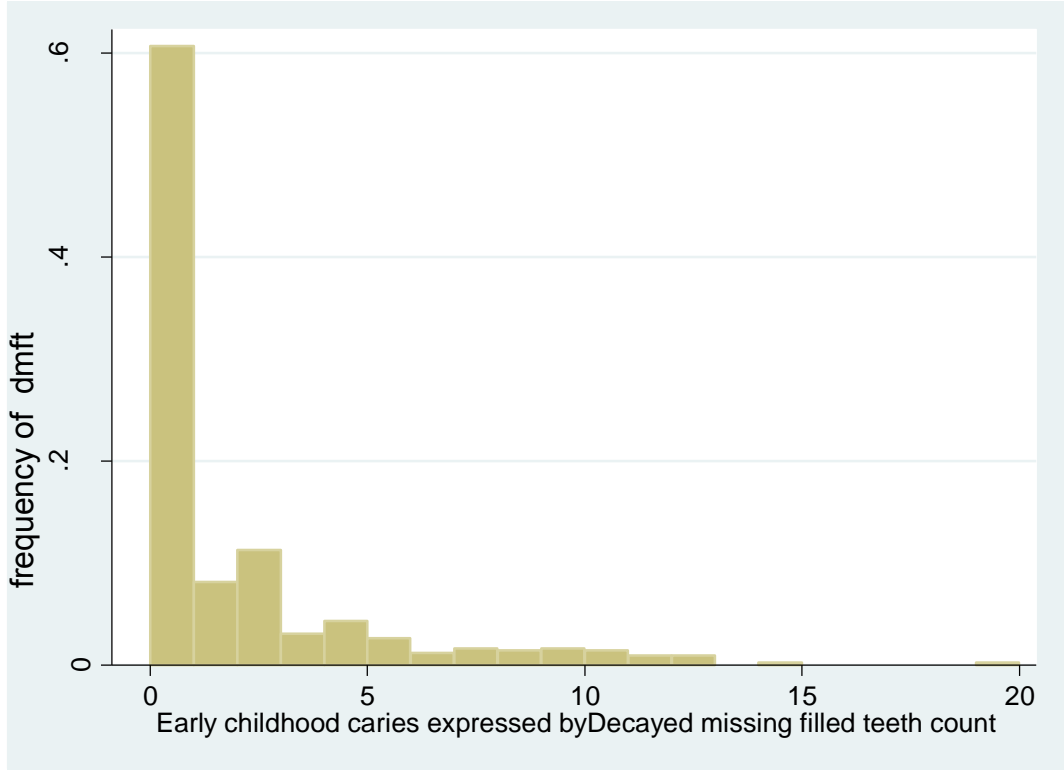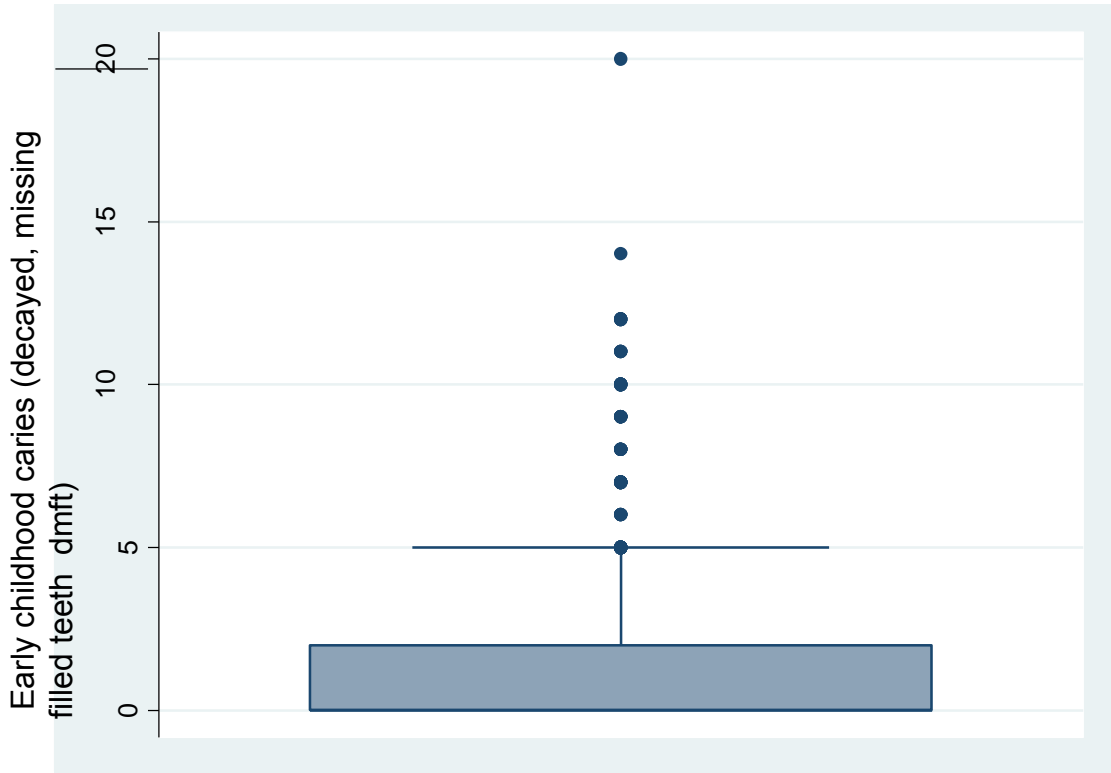

Supplement: pone.0125352.s003.pdf [file pone.0125352.s003.pdf]
