# Supplementary material for: Effect of Breastfeeding Promotion on Early Childhood Caries and Breastfeeding Duration among 5 Year Old Children in Eastern Uganda: A Cluster Randomized Trial
Source: PubMed Central journal article supplement (PMC4418833; doi:10.1371/journal.pone.0125352), 2015-05-04
Supplement: pone.0125352.s005.pdf [file pone.0125352.s005.pdf]

Table S1A showing zero inflated model with Vuong's test (n=417)

|                                             | <b>Beta coefficient</b> | <b>95% confidence intervals</b> |
|---------------------------------------------|-------------------------|---------------------------------|
| <b>First step (binomial count variable)</b> |                         |                                 |
| Intervention                                | 0.015                   | (-0.37– 0.34)                   |
| Control                                     | 0                       | 0                               |
| <b>Second step (non-zero ECC outcome)</b>   |                         |                                 |
| Intervention                                | 0.17                    | (-0.41– 0.75)                   |
| Control                                     | 0                       | 0                               |

ECC- Early childhood caries  
 Zinb- zero inflated negative binomial regression  
 Vuong's test of zinb vs. standard negative binomial:  $z = 2.09$ ,  $Pr > z = 0.0184$   
 Vuong's test does not take clustering into account  
 $p < 0.05$

Table S1B showing zero inflated model with incidence rate ratios and odds ratio

| <b>First step (binomial count variable)</b> |            |                                 |
|---------------------------------------------|------------|---------------------------------|
|                                             | <b>IRR</b> | <b>95% confidence intervals</b> |
| Intervention                                | 0.99       | (0.70–1.39)                     |
| Control                                     | 1          |                                 |
| <b>Second step (non-zero ECC outcome)</b>   |            |                                 |
|                                             | <b>OR</b>  | <b>95% confidence intervals</b> |
| Intervention                                | 1.19       | (0.71–1.99)                     |
| Control                                     | 1          |                                 |

Incidence rate ratio - IRR, Odds ratio- OR
